# Supplementary material for: Use of North American and European air quality networks to evaluate global chemistry–climate modeling of surface ozone
Source: Copernicus journal article supplement (doi:10.5194/acp-15-10581-2015), 2015-09-25
Supplement: Supplementary file 1 [file acp-15-10581-2015-supplement.zip]

**Table S1.** Longitude range for each latitude range used in the interpolation over NA and EU. For longitudinal ranges in EU spanning across 0°/360°, it is implied this longitude is included (e.g., 350-1 = 10°W- 1°E).

| <i>North America (NA)<sup>a</sup></i>              |                                                  | <i>Europe (EU)<sup>b</sup></i>                     |                                                  |
|----------------------------------------------------|--------------------------------------------------|----------------------------------------------------|--------------------------------------------------|
| Latitude range<br>(°N, southern-<br>northern edge) | Longitude range<br>(°E, western-eastern<br>edge) | Latitude range<br>(°N, southern-<br>northern edge) | Longitude range<br>(°E, western-eastern<br>edge) |
| 25-26                                              | 278-280                                          | 36-37                                              | 352-358                                          |
| 26-27                                              | 260-263; 277-280                                 | 37-38                                              | 351-360; 12-17; 21-24                            |
| 27-28                                              | 260-263; 277-280                                 | 38-39                                              | 350-1; 8-24                                      |
| 28-29                                              | 259-265; 277-280                                 | 39-40                                              | 350-1; 8-24                                      |
| 29-30                                              | 255-280                                          | 40-41                                              | 351-2; 8-24; 26-29                               |
| 30-31                                              | 254-280                                          | 41-42                                              | 351-3; 8-30                                      |
| 31-32                                              | 247-280                                          | 42-43                                              | 350-3; 8-29                                      |
| 32-33                                              | 242-281                                          | 43-44                                              | 350-29                                           |
| 33-34                                              | 241-282                                          | 44-45                                              | 355-30                                           |
| 34-35                                              | 239-284                                          | 45-46                                              | 355-31                                           |
| 35-36                                              | 238-285                                          | 46-47                                              | 355-31                                           |
| 36-37                                              | 238-285                                          | 47-48                                              | 355-31                                           |
| 37-38                                              | 237-285                                          | 48-49                                              | 355-30                                           |
| 38-39                                              | 236-285                                          | 49-50                                              | 354-29                                           |
| 39-40                                              | 236-286                                          | 50-51                                              | 354-28                                           |
| 40-41                                              | 235-288                                          | 51-52                                              | 349-28                                           |
| 41-42                                              | 235-290                                          | 52-53                                              | 349-28                                           |
| 42-43                                              | 235-290                                          | 53-54                                              | 349-29                                           |
| 43-44                                              | 235-292                                          | 54-55                                              | 349-29                                           |
| 44-45                                              | 235-293                                          | 55-56                                              | 351-30                                           |
| 45-46                                              | 235-293                                          | 56-57                                              | 352-31                                           |
| 46-47                                              | 235-293                                          | 57-58                                              | 352-31                                           |
| 47-48                                              | 235-293                                          | 58-59                                              | 353-32                                           |
| 48-49                                              | 235-293                                          | 59-60                                              | 356-33                                           |
|                                                    |                                                  | 60-61                                              | 357-33                                           |
|                                                    |                                                  | 61-62                                              | 4-33                                             |
|                                                    |                                                  | 62-63                                              | 5-33                                             |
|                                                    |                                                  | 63-64                                              | 7-34                                             |
|                                                    |                                                  | 64-65                                              | 11-32                                            |
|                                                    |                                                  | 65-66                                              | 12-32                                            |
|                                                    |                                                  | 66-67                                              | 13-32                                            |
|                                                    |                                                  | 67-68                                              | 17-32                                            |
|                                                    |                                                  | 68-69                                              | 18-32                                            |
|                                                    |                                                  | 69-70                                              | 20-31                                            |
|                                                    |                                                  | 70-71                                              | 23-28                                            |

<sup>a</sup>Western (WNA) and eastern (ENA) North America is split by 264°E

<sup>b</sup>Southern (SEU) and northern (NEU) Europe is split by 53°N

**Table S2.** Summary statistics for the observations (OBS), ACCMIP models (A-H), and UCI CTM (I) with respect to summer (JJA) and winter (DJF) diurnal cycles.

| Data                     | Metric, description (unit)         | OBS  | A    | B     | C    | D    | E    | F    | G    | H    | I    |
|--------------------------|------------------------------------|------|------|-------|------|------|------|------|------|------|------|
| WNA diurnal summer (JJA) | $h$ , maximum phase (hour)         | 15.3 | 16.6 | 16.6  | 16.5 | 15.4 | 15.3 | 14.9 | 15.2 | 16.0 | 12.9 |
|                          | $H$ , peak-to-peak amplitude (ppb) | 26.8 | 28.4 | 17.7  | 20.3 | 22.8 | 20.6 | 18.1 | 11.5 | 17.9 | 34.4 |
|                          | MB, mean bias (ppb)                | -    | 3.6  | 10.8  | -0.5 | 5.1  | 2.4  | 4.6  | 5.9  | 14.7 | 20.0 |
|                          | $R$ , cycle correlation            | 1.00 | 0.92 | 0.92  | 0.94 | 0.99 | 1.00 | 0.98 | 0.99 | 0.97 | 0.75 |
|                          | NSD, normalized standard deviation | 1.00 | 1.07 | 0.69  | 0.75 | 0.84 | 0.76 | 0.67 | 0.43 | 0.69 | 1.33 |
| ENA diurnal summer (JJA) | $h$ , maximum phase (hour)         | 15.0 | 17.0 | 16.1  | 16.5 | 15.5 | 15.8 | 15.2 | 15.7 | 16.0 | 12.7 |
|                          | $H$ , peak-to-peak amplitude (ppb) | 29.1 | 28.3 | 28.4  | 21.8 | 22.7 | 21.8 | 22.6 | 12.1 | 18.5 | 54.0 |
|                          | MB, mean bias (ppb)                | -    | 19.0 | 24.4  | 1.1  | 12.2 | 3.5  | 17.9 | 21.1 | 12.9 | 37.0 |
|                          | $R$ , cycle correlation            | 1.00 | 0.87 | 0.95  | 0.92 | 0.99 | 0.97 | 0.98 | 0.96 | 0.95 | 0.75 |
|                          | NSD, normalized standard deviation | 1.00 | 0.99 | 0.99  | 0.74 | 0.78 | 0.75 | 0.77 | 0.44 | 0.66 | 1.95 |
| SEU diurnal summer (JJA) | $h$ , maximum phase (hour)         | 15.5 | 16.4 | 16.6  | 16.4 | 15.1 | 15.6 | 15.3 | 15.5 | 16.3 | 13.1 |
|                          | $H$ , peak-to-peak amplitude (ppb) | 24.3 | 31.9 | 20.3  | 18.8 | 21.3 | 16.2 | 15.0 | 12.9 | 15.3 | 36.0 |
|                          | MB, mean bias (ppb)                | -    | 17.0 | 17.8  | 5.2  | 16.8 | 1.0  | 12.4 | 21.8 | 14.3 | 31.5 |
|                          | $R$ , cycle correlation            | 1.00 | 0.96 | 0.94  | 0.97 | 0.99 | 1.00 | 0.99 | 0.99 | 0.97 | 0.74 |
|                          | NSD, normalized standard deviation | 1.00 | 1.33 | 0.87  | 0.77 | 0.87 | 0.67 | 0.62 | 0.54 | 0.65 | 1.54 |
| NEU diurnal summer (JJA) | $h$ , maximum phase (hour)         | 15.1 | 17.1 | 16.7  | 16.5 | 15.0 | 16.0 | 15.6 | 16.2 | 15.8 | 14.4 |
|                          | $H$ , peak-to-peak amplitude (ppb) | 13.9 | 15.8 | 11.2  | 10.0 | 11.1 | 8.2  | 9.0  | 7.2  | 8.7  | 13.1 |
|                          | MB, mean bias (ppb)                | -    | 15.9 | 11.2  | 4.9  | 13.8 | 0.9  | 8.8  | 12.7 | 3.7  | 23.5 |
|                          | $R$ , cycle correlation            | 1.00 | 0.86 | 0.90  | 0.93 | 1.00 | 0.96 | 0.99 | 0.94 | 0.97 | 0.97 |
|                          | NSD, normalized standard deviation | 1.00 | 1.16 | 0.82  | 0.72 | 0.80 | 0.59 | 0.65 | 0.53 | 0.64 | 0.95 |
| WNA diurnal winter (DJF) | $h$ , maximum phase (hour)         | 14.8 | 17.1 | 17.9  | 16.0 | 14.8 | 15.0 | 15.6 | 14.0 | 16.8 | 16.7 |
|                          | $H$ , peak-to-peak amplitude (ppb) | 9.8  | 11.5 | 5.9   | 8.8  | 7.5  | 6.2  | 7.9  | 3.7  | 6.0  | 13.2 |
|                          | MB, mean bias (ppb)                | -    | 6.4  | 16.7  | 14.4 | 6.8  | 2.0  | 6.1  | 23.6 | 13.6 | 8.2  |
|                          | $R$ , cycle correlation            | 1.00 | 0.76 | 0.69  | 0.92 | 0.98 | 0.97 | 0.95 | 0.95 | 0.88 | 0.83 |
|                          | NSD, normalized standard deviation | 1.00 | 1.06 | 0.54  | 0.80 | 0.69 | 0.58 | 0.73 | 0.35 | 0.60 | 1.18 |
| ENA diurnal winter (DJF) | $h$ , maximum phase (hour)         | 15.1 | 18.0 | 16.7  | 15.7 | 15.3 | 14.0 | 15.9 | 14.8 | 16.3 | 16.1 |
|                          | $H$ , peak-to-peak amplitude (ppb) | 9.1  | 6.7  | 7.5   | 11.3 | 7.8  | 5.8  | 6.9  | 2.4  | 10.6 | 12.6 |
|                          | MB, mean bias (ppb)                | -    | 10.2 | 13.2  | 9.8  | -1.5 | -4.6 | 4.0  | 30.1 | 5.5  | 4.8  |
|                          | $R$ , cycle correlation            | 1.00 | 0.72 | 0.90  | 0.98 | 0.99 | 0.92 | 0.97 | 0.97 | 0.95 | 0.92 |
|                          | NSD, normalized standard deviation | 1.00 | 0.72 | 0.76  | 1.16 | 0.82 | 0.61 | 0.71 | 0.25 | 1.12 | 1.26 |
| SEU diurnal winter (DJF) | $h$ , maximum phase (hour)         | 15.1 | 17.6 | 17.8  | 16.1 | 15.0 | 14.2 | 15.8 | 14.7 | 16.4 | 16.4 |
|                          | $H$ , peak-to-peak amplitude (ppb) | 5.1  | 3.5  | 3.5   | 6.7  | 4.2  | 2.5  | 3.9  | 1.4  | 5.1  | 10.8 |
|                          | MB, mean bias (ppb)                | -    | 8.3  | 17.5  | 18.4 | 8.6  | 5.7  | 9.6  | 27.7 | 12.5 | 12.7 |
|                          | $R$ , cycle correlation            | 1.00 | 0.71 | 0.71  | 0.90 | 0.93 | 0.86 | 0.91 | 0.95 | 0.91 | 0.82 |
|                          | NSD, normalized standard deviation | 1.00 | 0.95 | 0.53  | 1.04 | 0.67 | 0.41 | 0.60 | 0.23 | 0.83 | 1.63 |
| NEU diurnal winter (DJF) | $h$ , maximum phase (hour)         | 4.5  | 17.8 | 6.5   | 14.9 | 14.5 | 13.3 | 15.3 | 12.2 | 15.0 | 16.2 |
|                          | $H$ , peak-to-peak amplitude (ppb) | 0.2  | 1.5  | 0.2   | 1.5  | 1.1  | 0.9  | 0.8  | 0.4  | 1.5  | 2.4  |
|                          | MB, mean bias (ppb)                | -    | -2.7 | 13.8  | 15.4 | 2.3  | -1.4 | 0.0  | 26.9 | 6.2  | 8.2  |
|                          | $R$ , cycle correlation            | 1.00 | 0.27 | -0.72 | 0.50 | 0.54 | 0.27 | 0.40 | 0.24 | 0.45 | 0.32 |
|                          | NSD, normalized standard deviation | 1.00 | 1.01 | 0.27  | 1.06 | 0.83 | 0.63 | 0.52 | 0.28 | 1.05 | 1.56 |

| <b>Table S3.</b> Summary statistics for the observations (OBS), ACCMIP models (A-H), and UCI CTM (I) with respect to the annual cycle of MDA8. |                                                     |      |      |      |       |      |      |      |       |      |      |
|------------------------------------------------------------------------------------------------------------------------------------------------|-----------------------------------------------------|------|------|------|-------|------|------|------|-------|------|------|
| Data                                                                                                                                           | Metric, description (unit)                          | OBS  | A    | B    | C     | D    | E    | F    | G     | H    | I    |
| WNA<br>annual<br>MDA8                                                                                                                          | $m$ , maximum phase (month)                         | 5.6  | 5.5  | 4.9  | 3.3   | 5.4  | 5.6  | 5.6  | 1.5   | 6.6  | 6.0  |
|                                                                                                                                                | $M$ , peak-to-peak amplitude (ppb)                  | 21.7 | 16.7 | 13.0 | 12.4  | 20.4 | 20.6 | 15.9 | 5.0   | 18.3 | 37.0 |
|                                                                                                                                                | MB, mean bias (ppb)                                 | -    | 6.9  | 10.6 | 6.9   | 4.7  | -0.5 | 2.4  | 10.0  | 10.6 | 15.5 |
|                                                                                                                                                | $R$ , cycle correlation                             | 1.00 | 0.96 | 0.90 | 0.36  | 0.98 | 1.00 | 0.99 | -0.49 | 0.86 | 0.97 |
|                                                                                                                                                | NSD, normalized standard deviation                  | 1.00 | 0.82 | 0.66 | 0.68  | 0.94 | 0.94 | 0.74 | 0.24  | 0.88 | 1.71 |
|                                                                                                                                                | $\bar{E}_{JJA}$ , 87th – 30th percentile (ppb)      | 19.7 | 19.5 | 14.5 | 16.4  | 17.9 | 17.2 | 15.1 | 17.5  | 18.5 | 29.7 |
|                                                                                                                                                | $R_{E-JJA}$ , spatial correlation of $E_{JJA}$ maps | 1.00 | 0.54 | 0.59 | 0.28  | 0.43 | 0.47 | 0.59 | 0.17  | 0.61 | 0.63 |
| ENA<br>annual<br>MDA8                                                                                                                          | $m$ , maximum phase (month)                         | 5.3  | 5.8  | 6.0  | 3.7   | 5.8  | 5.7  | 6.1  | 6.0   | 6.2  | 6.3  |
|                                                                                                                                                | $M$ , peak-to-peak amplitude (ppb)                  | 20.7 | 29.8 | 29.1 | 12.8  | 32.7 | 25.9 | 31.5 | 3.5   | 20.3 | 64.6 |
|                                                                                                                                                | MB, mean bias (ppb)                                 | -    | 16.9 | 16.6 | 6.8   | 4.2  | -4.2 | 8.1  | 20.1  | 8.0  | 24.8 |
|                                                                                                                                                | $R$ , cycle correlation                             | 1.00 | 0.95 | 0.90 | 0.57  | 0.96 | 0.96 | 0.93 | 0.56  | 0.89 | 0.86 |
|                                                                                                                                                | NSD, normalized standard deviation                  | 1.00 | 1.47 | 1.45 | 0.83  | 1.57 | 1.24 | 1.51 | 0.28  | 1.03 | 3.08 |
|                                                                                                                                                | $\bar{E}_{JJA}$ , 87th – 30th percentile (ppb)      | 22.8 | 33.0 | 27.5 | 19.4  | 27.0 | 22.4 | 28.3 | 19.1  | 21.9 | 56.1 |
|                                                                                                                                                | $R_{E-JJA}$ , spatial correlation of $E_{JJA}$ maps | 1.00 | 0.70 | 0.81 | 0.52  | 0.69 | 0.69 | 0.34 | 0.27  | 0.69 | 0.71 |
| SEU<br>annual<br>MDA8                                                                                                                          | $m$ , maximum phase (month)                         | 5.5  | 5.8  | 5.6  | 4.0   | 5.8  | 5.5  | 5.7  | 6.7   | 6.2  | 5.9  |
|                                                                                                                                                | $M$ , peak-to-peak amplitude (ppb)                  | 26.3 | 37.9 | 22.7 | 14.6  | 33.8 | 17.4 | 24.9 | 11.9  | 21.0 | 49.4 |
|                                                                                                                                                | MB, mean bias (ppb)                                 | -    | 15.6 | 16.2 | 13.0  | 11.4 | 1.3  | 8.1  | 21.1  | 11.2 | 23.7 |
|                                                                                                                                                | $R$ , cycle correlation                             | 1.00 | 0.98 | 1.00 | 0.66  | 0.98 | 0.99 | 0.97 | 0.78  | 0.91 | 0.97 |
|                                                                                                                                                | NSD, normalized standard deviation                  | 1.00 | 1.45 | 0.86 | 0.64  | 1.27 | 0.66 | 0.94 | 0.49  | 0.84 | 1.87 |
|                                                                                                                                                | $\bar{E}_{JJA}$ , 87th – 30th percentile (ppb)      | 23.6 | 30.1 | 18.0 | 16.7  | 24.9 | 15.2 | 20.9 | 14.8  | 18.8 | 37.9 |
|                                                                                                                                                | $R_{E-JJA}$ , spatial correlation of $E_{JJA}$ maps | 1.00 | 0.33 | 0.71 | 0.15  | 0.77 | 0.54 | 0.46 | 0.24  | 0.65 | 0.62 |
| NEU<br>annual<br>MDA8                                                                                                                          | $m$ , maximum phase (month)                         | 4.3  | 5.6  | 3.9  | 2.7   | 5.5  | 4.7  | 5.4  | 1.1   | 3.9  | 5.6  |
|                                                                                                                                                | $M$ , peak-to-peak amplitude (ppb)                  | 17.4 | 32.8 | 14.0 | 18.3  | 22.7 | 12.4 | 19.3 | 10.4  | 8.3  | 26.2 |
|                                                                                                                                                | MB, mean bias (ppb)                                 | -    | 8.3  | 12.2 | 11.8  | 7.0  | -2.0 | 2.1  | 19.1  | 4.6  | 15.1 |
|                                                                                                                                                | $R$ , cycle correlation                             | 1.00 | 0.78 | 0.97 | 0.64  | 0.82 | 0.96 | 0.82 | 0.00  | 0.88 | 0.78 |
|                                                                                                                                                | NSD, normalized standard deviation                  | 1.00 | 1.87 | 0.82 | 1.21  | 1.29 | 0.71 | 1.09 | 0.67  | 0.57 | 1.48 |
|                                                                                                                                                | $\bar{E}_{JJA}$ , 87th – 30th percentile (ppb)      | 15.8 | 30.5 | 15.3 | 19.5  | 17.7 | 13.4 | 17.6 | 14.4  | 13.3 | 20.9 |
|                                                                                                                                                | $R_{E-JJA}$ , spatial correlation of $E_{JJA}$ maps | 1.00 | 0.51 | 0.50 | -0.39 | 0.63 | 0.63 | 0.66 | 0.11  | 0.23 | 0.63 |

**Table S4.** Summary statistics for the observations (OBS), ACCMIP models (A-H), and UCI CTM (I) with respect to the annual cycle of AQX events and AQX episodes (NA and EU combined, 100 AQX events per decade case).

| Data                  | Metric, description (unit)                                                                                    | OBS  | A    | B    | C     | D    | E    | F    | G     | H    | I    |
|-----------------------|---------------------------------------------------------------------------------------------------------------|------|------|------|-------|------|------|------|-------|------|------|
| WNA<br>AQX<br>events  | $m_{AQX}$ , maximum phase (month)                                                                             | 6.1  | 5.9  | 4.6  | 3.0   | 4.9  | 6.0  | 6.1  | 1.7   | 7.5  | 6.5  |
|                       | $R$ , AQX cycle correlation                                                                                   | 1.00 | 0.85 | 0.41 | -0.24 | 0.57 | 0.97 | 0.96 | -0.07 | 0.64 | 0.78 |
|                       | NSD, normalized standard deviation                                                                            | 1.00 | 0.53 | 0.65 | 1.74  | 1.15 | 1.01 | 1.06 | 0.57  | 1.35 | 1.58 |
|                       | $R_{MDA8}$ , correlation of AQX and MDA8 cycles                                                               | 0.81 | 0.82 | 0.89 | 0.91  | 0.80 | 0.82 | 0.77 | 0.59  | 0.78 | 0.69 |
|                       | $\bar{E}_{AQX}$ , AQX threshold – 30th percentile (ppb)                                                       | 27.6 | 29.2 | 20.6 | 26.9  | 24.4 | 23.7 | 21.5 | 25.4  | 26.7 | 43.2 |
|                       | $R_{E-AQX}$ , spatial correlation of $E_{AQX}$ maps                                                           | 1.00 | 0.66 | 0.66 | 0.40  | 0.49 | 0.35 | 0.56 | 0.36  | 0.55 | 0.62 |
| ENA<br>AQX<br>events  | $m_{AQX}$ , maximum phase (month)                                                                             | 5.5  | 6.2  | 6.8  | 3.2   | 6.2  | 6.4  | 6.6  | 6.8   | 7.7  | 6.6  |
|                       | $R$ , AQX cycle correlation                                                                                   | 1.00 | 0.80 | 0.65 | 0.04  | 0.88 | 0.79 | 0.76 | 0.70  | 0.36 | 0.65 |
|                       | NSD, normalized standard deviation                                                                            | 1.00 | 1.11 | 1.44 | 1.90  | 1.22 | 1.27 | 1.29 | 1.03  | 1.25 | 1.48 |
|                       | $R_{MDA8}$ , correlation of AQX and MDA8 cycles                                                               | 0.84 | 0.76 | 0.78 | 0.88  | 0.78 | 0.82 | 0.80 | 0.78  | 0.70 | 0.83 |
|                       | $\bar{E}_{AQX}$ , AQX threshold – 30th percentile (ppb)                                                       | 34.7 | 53.8 | 39.9 | 29.1  | 36.1 | 30.4 | 41.1 | 32.1  | 31.5 | 82.3 |
|                       | $R_{E-AQX}$ , spatial correlation of $E_{AQX}$ maps                                                           | 1.00 | 0.70 | 0.78 | 0.28  | 0.63 | 0.53 | 0.44 | 0.60  | 0.74 | 0.68 |
| SEU<br>AQX<br>events  | $m_{AQX}$ , maximum phase (month)                                                                             | 6.0  | 6.2  | 6.0  | 3.2   | 5.8  | 5.8  | 6.0  | 6.8   | 7.3  | 6.3  |
|                       | $R$ , AQX cycle correlation                                                                                   | 1.00 | 0.97 | 0.96 | -0.09 | 0.88 | 0.96 | 0.93 | 0.78  | 0.64 | 0.90 |
|                       | NSD, normalized standard deviation                                                                            | 1.00 | 0.99 | 1.11 | 1.68  | 1.30 | 0.96 | 1.19 | 1.17  | 1.40 | 1.33 |
|                       | $R_{MDA8}$ , correlation of AQX and MDA8 cycles                                                               | 0.81 | 0.79 | 0.76 | 0.84  | 0.73 | 0.84 | 0.82 | 0.90  | 0.74 | 0.80 |
|                       | $\bar{E}_{AQX}$ , AQX threshold – 30th percentile (ppb)                                                       | 33.9 | 46.3 | 24.3 | 25.1  | 30.8 | 21.5 | 30.2 | 26.3  | 29.3 | 57.4 |
|                       | $R_{E-AQX}$ , spatial correlation of $E_{AQX}$ maps                                                           | 1.00 | 0.33 | 0.70 | 0.12  | 0.66 | 0.42 | 0.20 | 0.07  | 0.58 | 0.51 |
| NEU<br>AQX<br>events  | $m_{AQX}$ , maximum phase (month)                                                                             | 4.3  | 5.5  | 3.9  | 3.2   | 5.3  | 4.6  | 5.6  | 4.2   | 4.4  | 5.9  |
|                       | $R$ , cycle correlation                                                                                       | 1.00 | 0.46 | 0.84 | 0.67  | 0.46 | 0.86 | 0.46 | 0.19  | 0.98 | 0.29 |
|                       | NSD, normalized standard deviation                                                                            | 1.00 | 0.81 | 0.85 | 1.57  | 1.18 | 0.88 | 0.99 | 0.91  | 0.74 | 1.14 |
|                       | $R_{MDA8}$ , correlation of AQX and MDA8 cycles                                                               | 0.87 | 0.84 | 0.93 | 0.85  | 0.73 | 0.93 | 0.85 | 0.26  | 0.90 | 0.74 |
|                       | $\bar{E}_{AQX}$ , AQX threshold – 30th percentile (ppb)                                                       | 23.9 | 45.8 | 20.6 | 29.1  | 23.3 | 19.5 | 29.1 | 21.8  | 17.9 | 31.6 |
|                       | $R_{E-AQX}$ , spatial correlation of $E_{AQX}$ maps                                                           | 1.00 | 0.51 | 0.55 | -0.47 | 0.54 | 0.53 | 0.55 | 0.53  | 0.45 | 0.60 |
| NA<br>AQX<br>episodes | $\bar{S}$ , weighted geometric mean AQX episode size ( $10^4 \text{ km}^2\text{-days}$ )                      | 415  | 128  | 229  | 1426  | 461  | 290  | 522  | 243   | 774  | 463  |
|                       | $CCD_{100}$ , fraction of AQX events' areas in AQX episodes $> 100 \times 10^4 \text{ km}^2\text{-days}$ (%)  | 79.0 | 56.1 | 73.7 | 92.6  | 85.3 | 76.1 | 80.3 | 73.0  | 83.0 | 80.2 |
|                       | $CCD_{1000}$ , fraction of AQX events' area in AQX episodes $> 1000 \times 10^4 \text{ km}^2\text{-days}$ (%) | 38.0 | 9.7  | 12.8 | 69.2  | 30.8 | 19.2 | 43.6 | 12.7  | 48.7 | 37.5 |
|                       | $\Delta \bar{E}_S$ , average increase in $E_S$ for AQX episodes of size $S$ (ppb-dec $^{-1}$ )                | 2.9  | 9.9  | 4.6  | 0.8   | 2.3  | 2.9  | -0.1 | 3.5   | 2.9  | 6.0  |
| EU<br>AQX<br>episodes | $\bar{S}$ , weighted geometric mean AQX episode size ( $10^4 \text{ km}^2\text{-days}$ )                      | 444  | 173  | 198  | 2106  | 656  | 290  | 616  | 498   | 606  | 535  |
|                       | $CCD_{100}$ , fraction of AQX events' areas in AQX episodes $> 100 \times 10^4 \text{ km}^2\text{-days}$ (%)  | 80.1 | 63.1 | 70.6 | 92.8  | 82.0 | 74.1 | 85.1 | 82.3  | 83.5 | 84.4 |
|                       | $CCD_{1000}$ , fraction of AQX events' area in AQX episodes $> 1000 \times 10^4 \text{ km}^2\text{-days}$ (%) | 34.9 | 18.1 | 15.2 | 70.0  | 53.7 | 23.7 | 51.5 | 46.5  | 49.6 | 39.8 |
|                       | $\Delta \bar{E}_S$ , average increase in $E_S$ for AQX episodes of size $S$ (ppb dec $^{-1}$ )                | 1.7  | 8.3  | 2.9  | 1.5   | 2.4  | 2.0  | 3.9  | 2.3   | 4.6  | 6.9  |



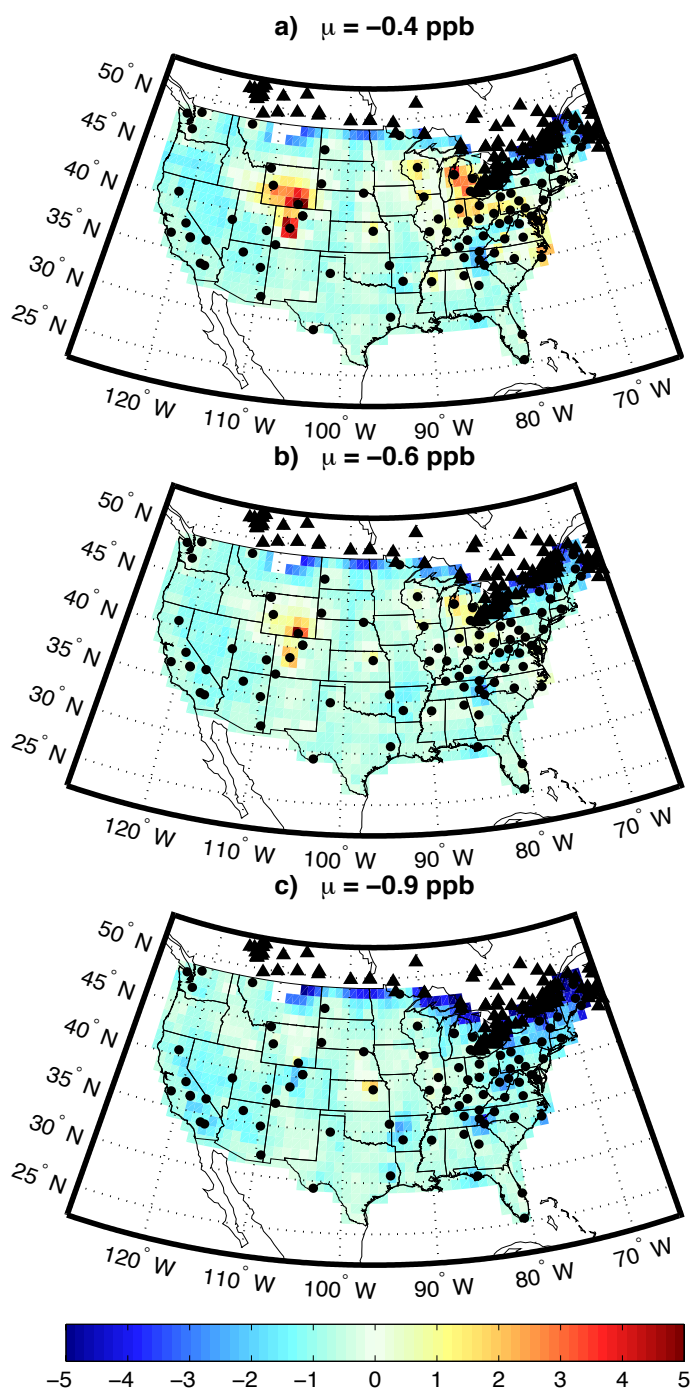

**Figure S1.** Change in the MDA8 O<sub>3</sub> (ppb) corresponding to the (a) 25th, (b) 50th, and (c) 95th percentiles over NA, shown as the datasets used in this analysis (AQS + CASTNet + NAPS) minus the dataset used in Schnell et al., (2014) (AQS only). The locations of the CASTNet (circles) and NAPS (triangles) stations and the domain area-weighted average difference are shown for each panel.

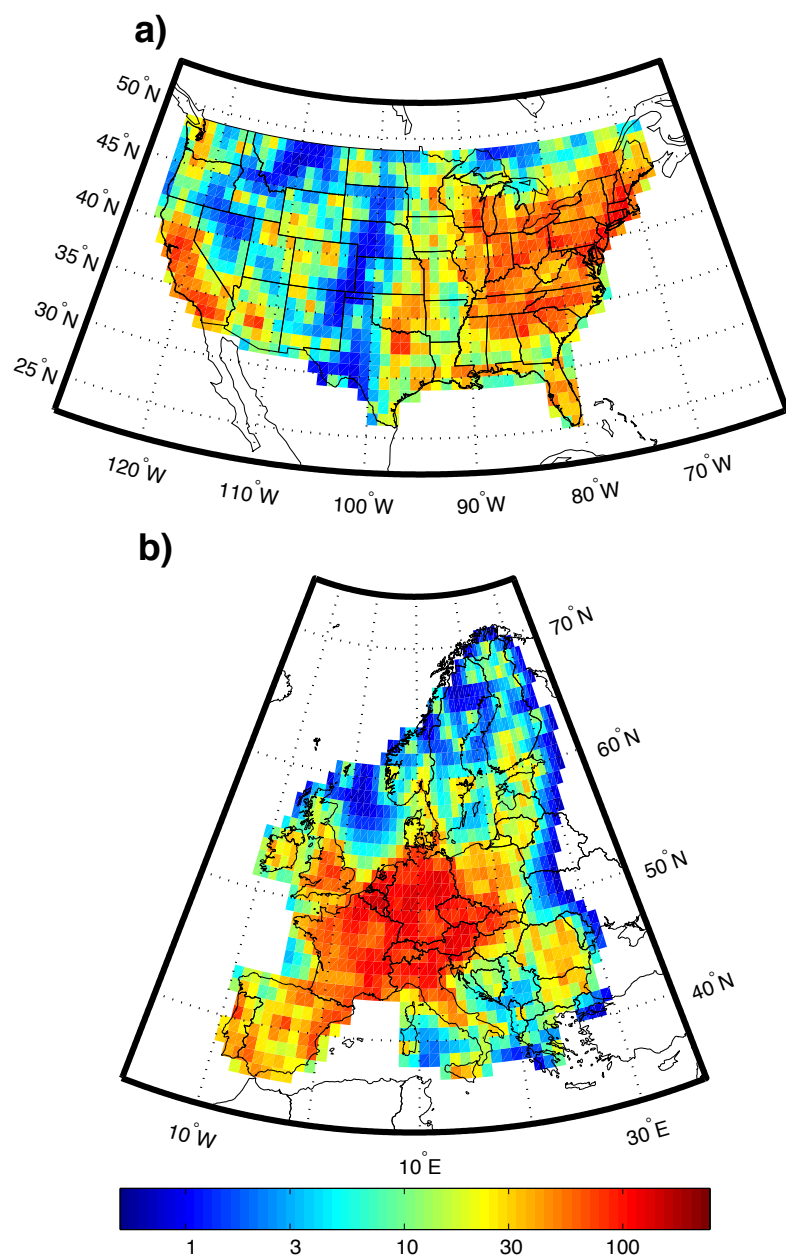

**Figure S2.** Quality of prediction index ( $Q^P$ , see S2014) for the interpolation of the 2000-2009 observations over (a) NA and (b) EU. Note the log-scale of the colorbar.

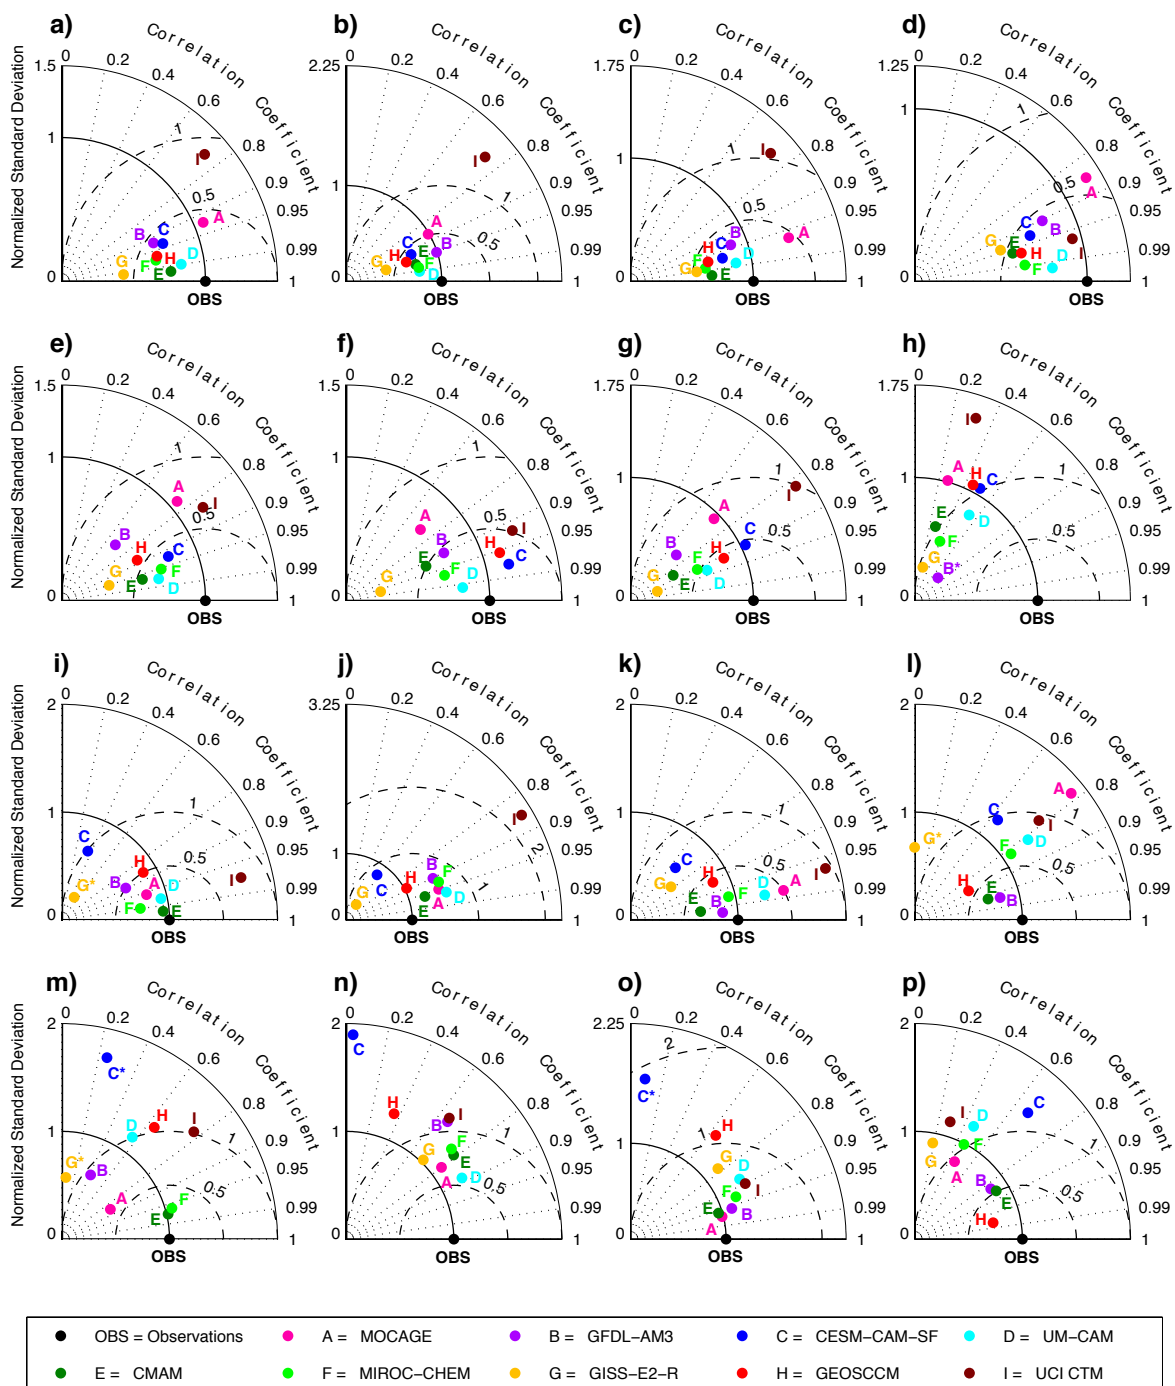

**Figure S3.** Taylor diagrams comparing the gridded observations of surface  $O_3$  (OBS) to the ACCMIP models (A-H) and the UCI CTM (I) for the (a-d) summer (JJA) diurnal cycle, (e-h) winter (DJF) diurnal cycle, (i-l) annual cycle of MDA8, and (m-p) annual cycle of AQX events averaged over (column 1) WNA, (column 2) ENA, (column 3) SEU, and (column 4) NEU. In cases where a model has a negative correlation, it is plotted as being positive and its letter abbreviation is appended with an asterisk.



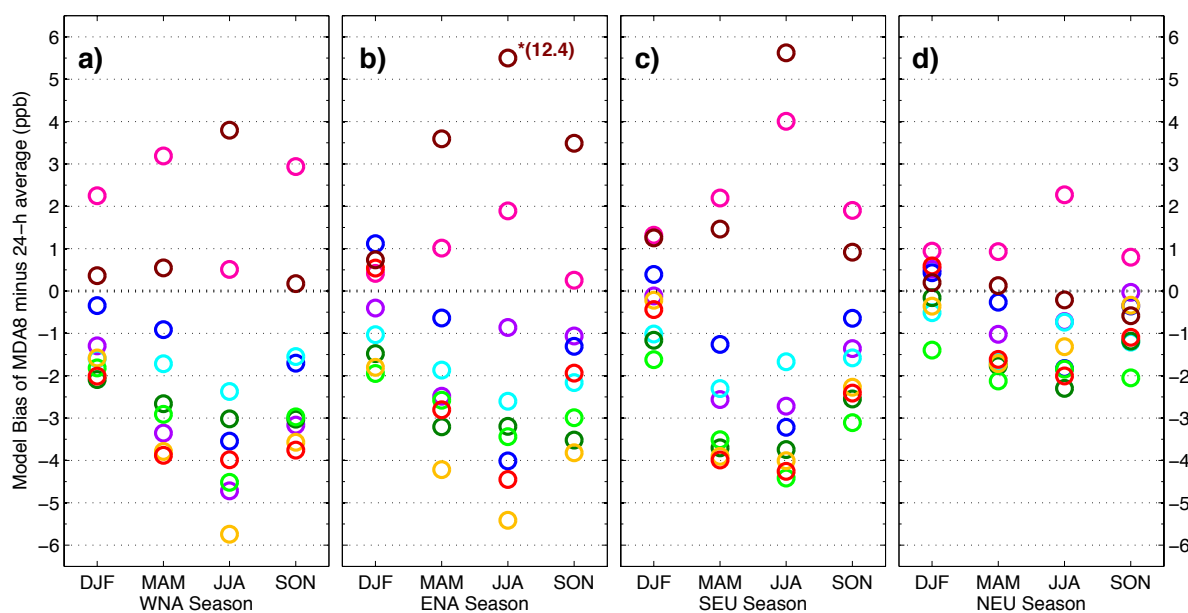

**Figure S4.** Model biases of MDA8 minus 24 h average O<sub>3</sub> (ppb) in (a) WNA, (b) ENA, (c) SEU, and (d) NEU averaged over winter (DJF), spring (MAM), summer (JJA), and fall (SON). The model corresponding to each colored circle can be found in the legend of Figs. 1 and S3. The circle for model I (dark red) in ENA JJA has been arbitrarily placed since its actual value (12.4 ppb) is outside the range shown in the panel.

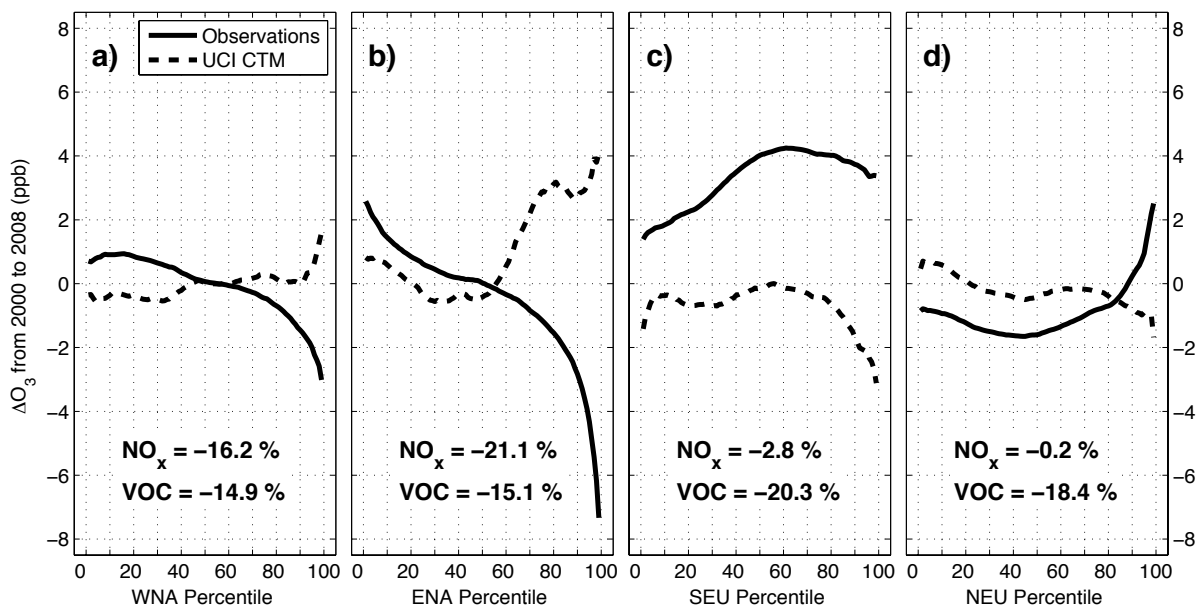

**Figure S5.** Change in MDA8 O<sub>3</sub> (2008 minus 2000) calculated from a linear fit to the region-wide average MDA8 O<sub>3</sub> corresponding to the 1st to 99th percentiles over (a) WNA, (b) ENA, (c) SEU, and (d) NEU for the observations (solid lines) and UCI CTM (dashed lines). The change (%) in NO<sub>x</sub> and total non-methane VOC emissions over the period are also given for each region.

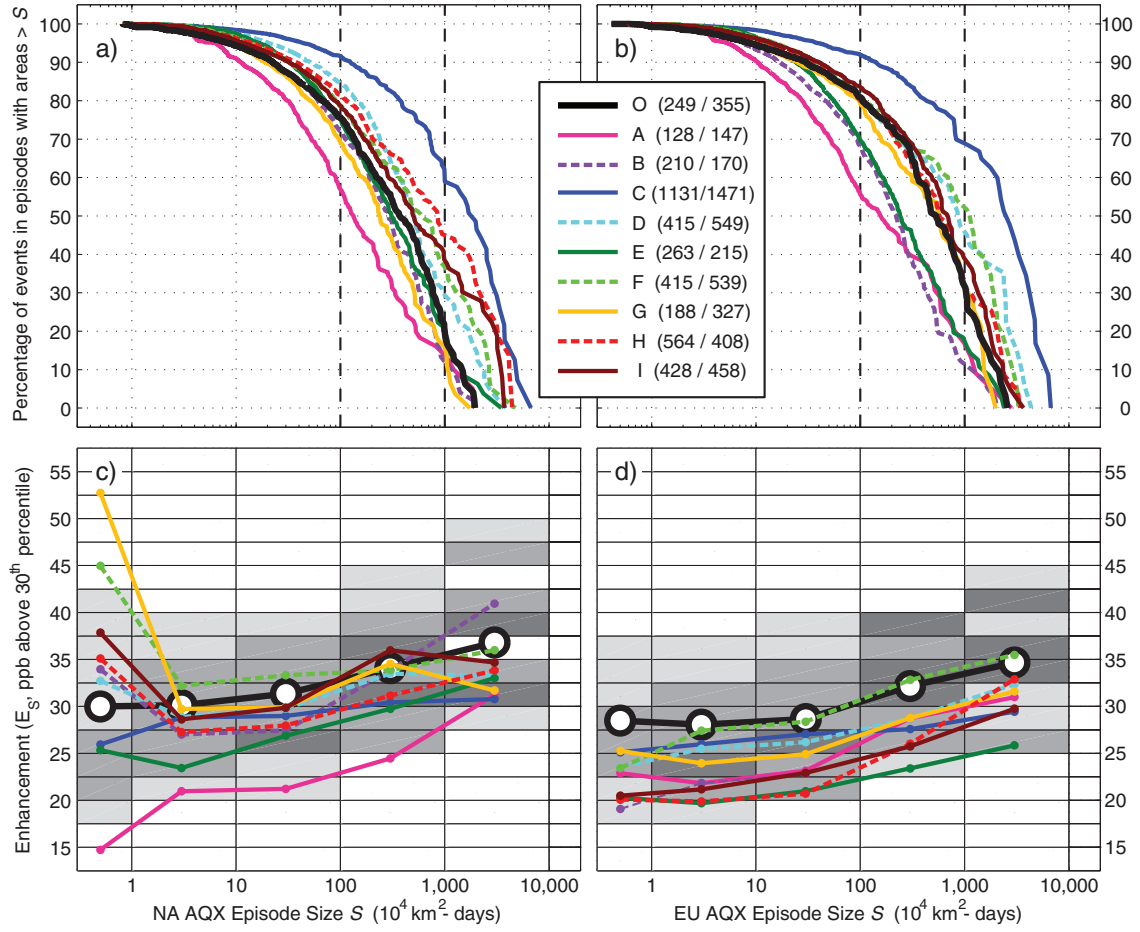

**Figure S6.** Similar to Fig. 4 but for the 10 AQX events per year case. **(a-b)** Complementary cumulative distribution (CCD) of the percentage of total areal extent of all individual AQX events (10-per-year case) as a function of AQX episode size, ( $S$ ,  $10^4 \text{ km}^2 \text{ days}$ ) for the observations (O), ACCMIP models (A-H), and UCI CTM (I) in **(a)** NA and **(b)** EU. Dashed vertical lines show the graphical representations of  $CCD_{100}$  and  $CCD_{1000}$ . Mean episode size  $\bar{S}$  for each dataset and domain is given in the legend as (NA/EU). **(c-d)** Density scatterplot of the observations enhancement of AQX episodes  $E_S$  versus their size  $S$  ( $E_S$  binned at 5 ppb increments from  $<15$  ppb to  $>55$  ppb,  $S$  binned at each log-decade) in **(c)** NA and **(d)** EU. The gray scale represents the relative percentage of AQX episodes in each  $(x, y) = (S, E_S)$  bin and includes percent ranges of  $\leq 5\%$  (white), 5-10%, 10-15%, and  $> 15\%$  (darkest gray) where the size bins (i.e., columns) are normalized to sum to 100%. The overlain curves show the observation's and each model's area-weighted mean enhancement  $E_S$  in each size bin. The values of  $E_S$  in each size bin for models A and I have been scaled by 0.5 since they are largely outside the range of the others.

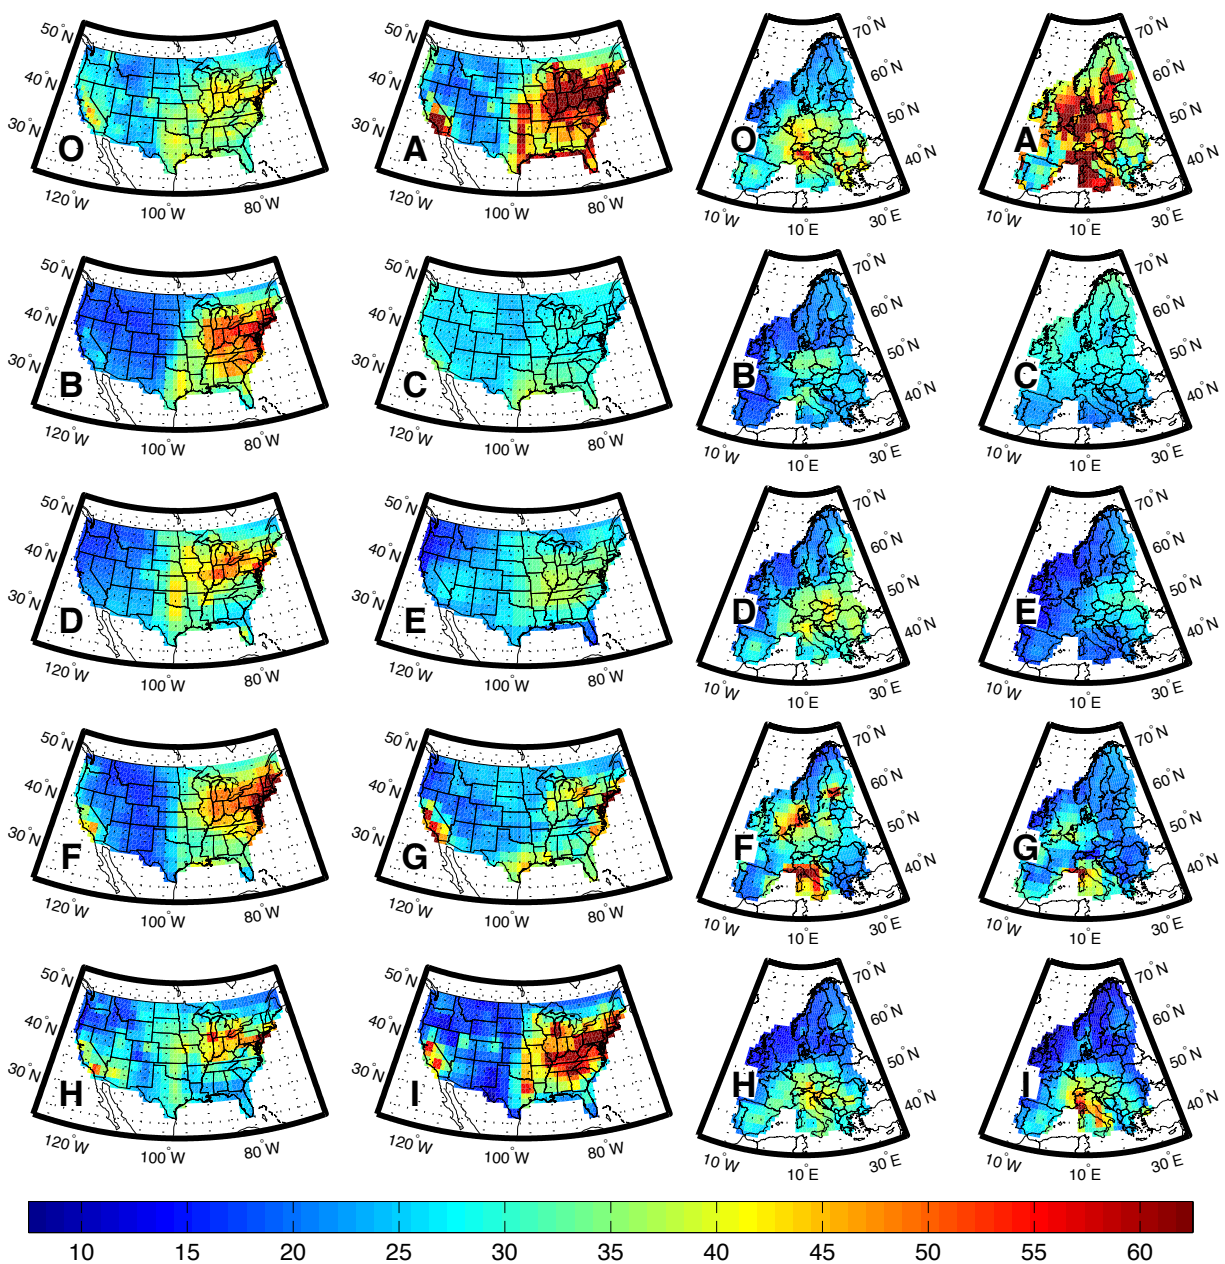

**Figure S7.** Enhancement at the AQX threshold  $E_{AQX}$  = difference between the  $\sim 97.3$  and 30th percentile of the gridded surface MDA8 O<sub>3</sub> (ppb) over (left two columns) NA and (right two columns) EU for the observations (O), ACCMIP models (A-H), and UCI CTM (I). The values of model I are scaled by 0.5 so the same color scale can be used.
