# Supplementary material for: Use of North American and European air quality networks to evaluate global chemistry–climate modeling of surface ozone
Source: Copernicus journal article supplement (doi:10.5194/acp-15-10581-2015), 2015-09-25
Supplement: Supplementary file 2 [file acp-15-10581-2015-supplement.zip]

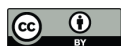

## *Supplement of*

# **Use of North American and European air quality networks to evaluate global chemistry–climate modeling of surface ozone**

**J. L. Schnell et al.**

*Correspondence to:* J. L. Schnell (jschnell@uci.edu)

- acp-15-10581-2015-supplement-title-page.pdf
- Supplement-acp-2015-118-J.L.Schnell
  - Figure-S1.eps
  - Figure-S2.eps
  - Figure-S3.eps
  - Figure-S4.eps
  - Figure-S5.eps
  - Figure-S6.eps
  - Figure-S7.eps
  - Supplement-Tables+Figures.pdf
- \_\_MACOSX
  - Supplement-acp-2015-118-J.L.Schnell
    - \* .\_Figure-S1.eps
    - \* .\_Figure-S2.eps
    - \* .\_Figure-S3.eps
    - \* .\_Figure-S4.eps
    - \* .\_Figure-S5.eps
    - \* .\_Figure-S6.eps
    - \* .\_Figure-S7.eps
    - \* .\_Supplement-Tables+Figures.pdf

The copyright of individual parts of the supplement might differ from the CC-BY 3.0 licence.
